# Supplementary material
Source: PubMed Central journal article supplement (PMC5508212)
Supplement: NIHMS837155-supplement-1.pdf [file NIHMS837155-supplement-1.pdf]

# **Behavioral clusters and predictors of performance during recovery from stroke**

**LE Ramsey<sup>1</sup>, JS Siegel<sup>1</sup>, CE Lang<sup>1,2,3</sup>, M Strube<sup>4</sup>, GL Shulman<sup>1</sup>, M Corbetta<sup>1,5,6,7,8</sup>**

### Supplementary Figure 1. Enrollment Flowchart

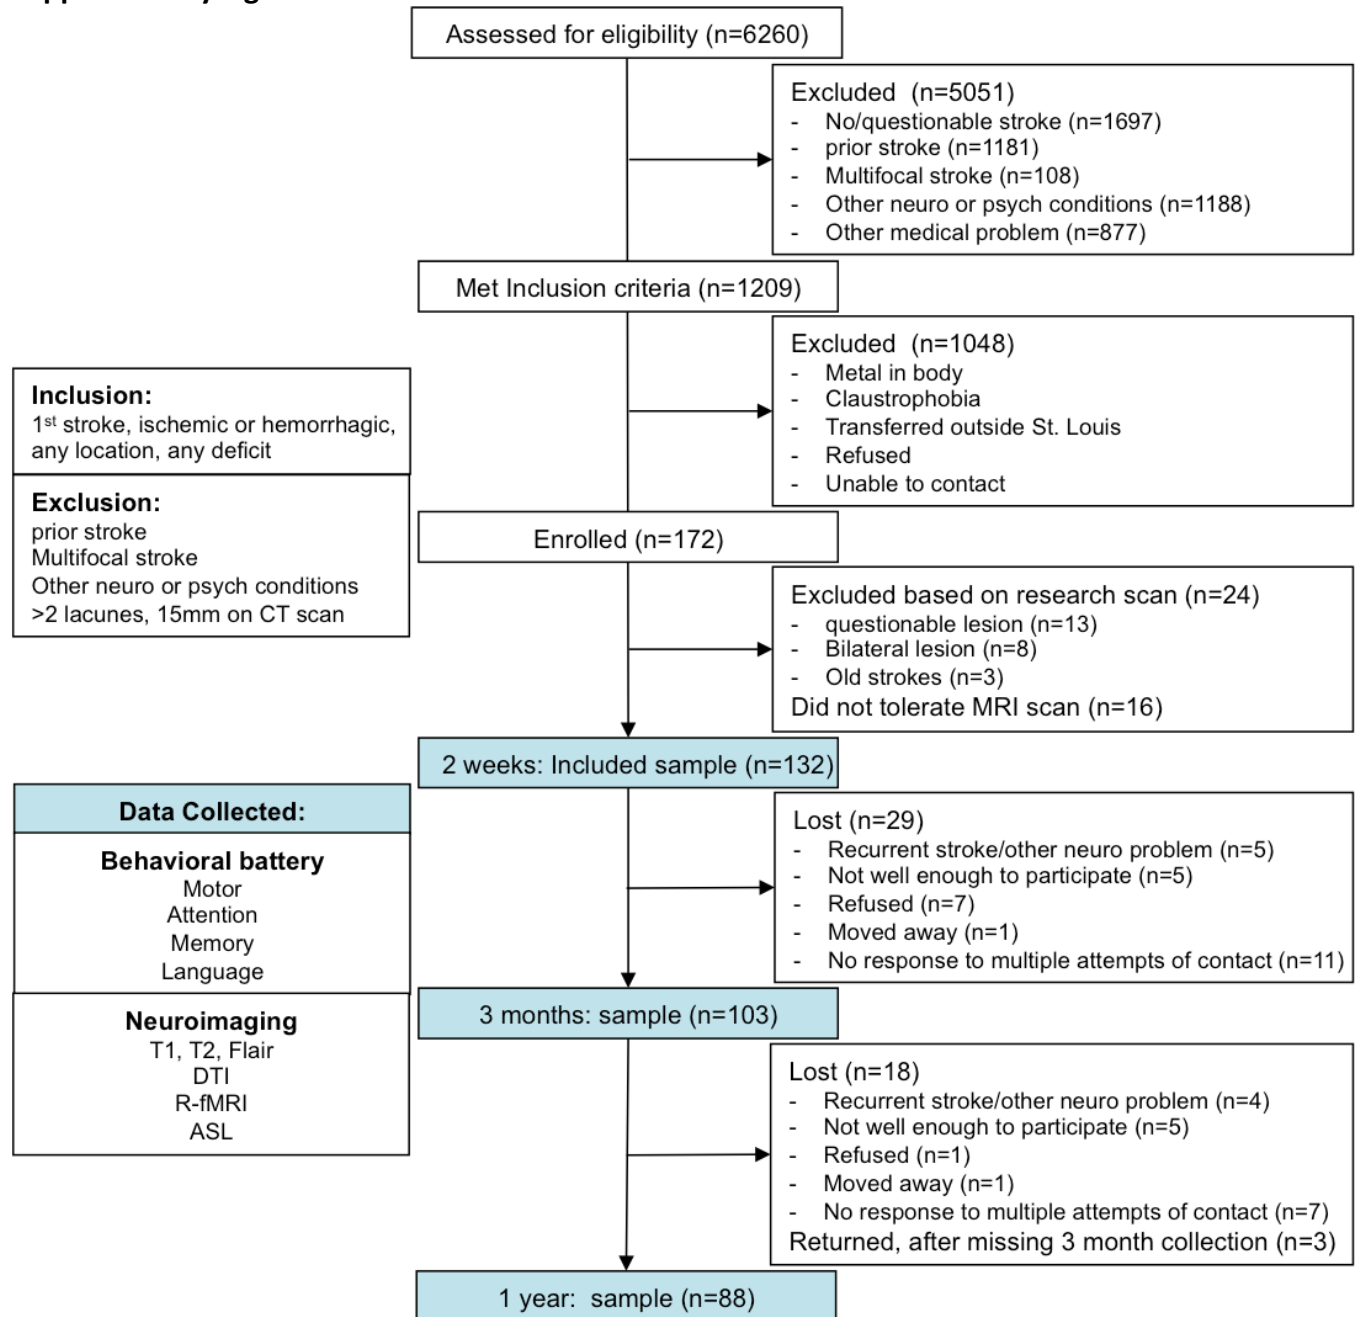

**Supplementary Figure 2.** Number of deficits. Histogram of the number of patients for each number of deficits (> 2 SD below controls) showing that many patients have more than 1 deficit. Only patients that have scores on all domains (n=67).

Histogram of number of deficits for each patient

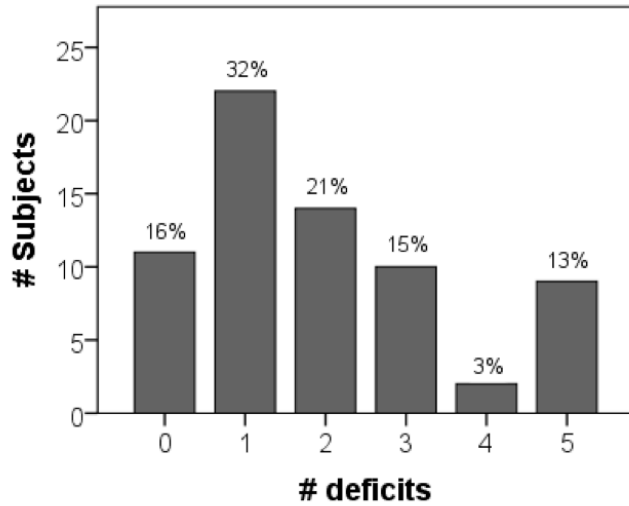

**Supplementary Figure 3.** Principal components of lesions, explaining >60% of variance, for lesions in their original location (a) and all flipped to the left hemisphere (b).

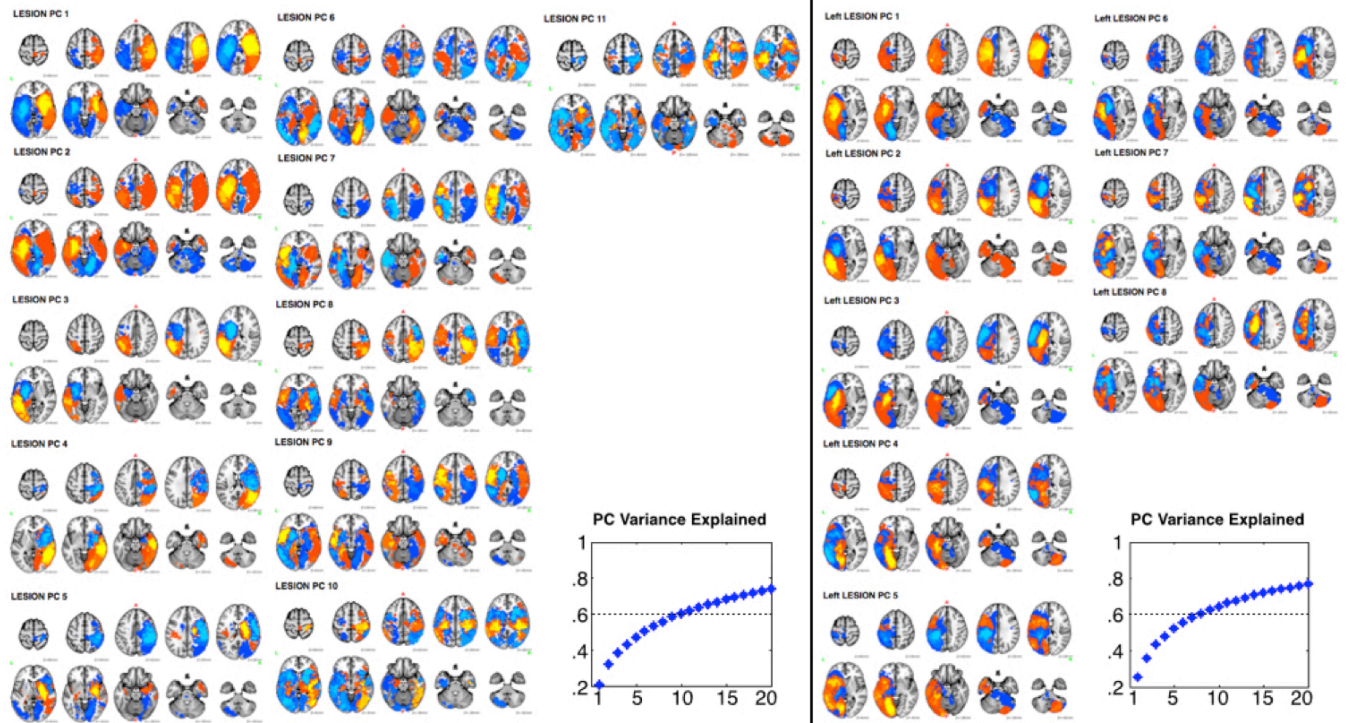

**Supplementary Table 1.** Demographics of stroke sample, healthy control group and source population (CRRG).

| <b>Variables</b>                 | <b>Stroke (n=132)</b> | <b>Controls (n=31)</b> | <b>CRRG (n=2341)</b> |
|----------------------------------|-----------------------|------------------------|----------------------|
| <b>Age (years)</b>               | 53 ± 10               | 55 ± 12                | 61±15 *              |
| <b>Women</b>                     | 61 (46%)              | 16 (52%)               | 1133 (48%)           |
| <b>Right handed</b>              | 121 (92%)             | 29 (94%)               | ?                    |
| <b>Left hemisphere lesion</b>    | 68 (52%)              | -                      | 948/1725 (55%)       |
| <b>Lesion type</b>               |                       |                        |                      |
| <b>Ischemic</b>                  | 102 (82%)             | -                      | 1778 (76%)           |
| <b>Hemorrhagic</b>               | 22 (18%)              | -                      | 569 (24%)            |
| <b>TPA</b>                       | 15 (11%)              | -                      | 227/2337 (10%)       |
| <b>Race</b>                      |                       |                        | *                    |
| <b>White</b>                     | 45 (34%)              | 10 (32%)               | 1419 (61%)           |
| <b>Black or African American</b> | 87 (66%)              | 20 (65%)               | 866 (37%)            |
| <b>Other</b>                     | 0 (0%)                | 1 (3%)                 | 56 (2%)              |
| <b>Years of education</b>        | 13.2 ± 2.6            | 13.6 ± 2.6             | 12.6 ± 2.8*          |
| <b>Risk factors</b>              |                       |                        |                      |
| <b>Hypertension</b>              | 92 (70%)              | 8 (26%)*               | 1709 (73%)           |
| <b>Diabetes Mellitus</b>         | 41 (31%)              | 5 (16%)                | 462 (20%)*           |
| <b>CAD</b>                       | 11 (8%)               | 2 (6%)                 | 512 (22%)*           |
| <b>Smoking</b>                   | 62 (47%)              | 13 (42%)               | 855 (37%)*           |
| <b>Hours of Therapy</b>          | 94 ± 143              | -                      |                      |
| <b>Lesionsize in cm3</b>         | 34.6 ± 46.9           | -                      |                      |

\*significantly different from stroke sample (p<0.05)

**Supplementary Table 2. Behavioral measures.**<sup>8</sup>

| Domain                | Test                                     | Score recorded                              | Function tested             |
|-----------------------|------------------------------------------|---------------------------------------------|-----------------------------|
| Motor (15 scores)     | AROM: Shoulder flexion                   | L&R Shoulder flexion <sup>1</sup>           | Range of motion (ROM)       |
|                       | AROM: Wrist extension                    | L&R Wrist extension <sup>1</sup>            |                             |
|                       | AROM Lower extremity                     | L&R Ankle dorsiflection <sup>1</sup>        |                             |
|                       | Jaram dynamometer                        | L&R Grip strength <sup>1</sup>              | Strength                    |
|                       | Nine hole peg test                       | L&R Hand pegs/sec <sup>1</sup>              | Dexterity                   |
|                       | ARAT                                     | L&R Total <sup>1</sup>                      | Dexterity and ROM           |
|                       | Motricity index                          | L&R Lower extremity total <sup>1</sup>      | Strength                    |
|                       | Timed walk                               | Index of timed walk + FIM walk item         | Walking                     |
|                       | FIM Walk Item                            |                                             | Walking                     |
| Language (9 scores)   | BDAE: Comprehension                      | Basic word discrimination                   | Comprehension               |
|                       |                                          | Commands                                    |                             |
|                       |                                          | Complex ideational material                 |                             |
|                       | BDAE: Expression                         | Boston naming short form                    | production, semantic        |
|                       | BDAE Reading                             | Oral reading of sentences                   | comprehension               |
|                       |                                          | Comprehension of oral reading of sentences  |                             |
| Experimental measures | Nonword reading                          | production, phonological                    |                             |
|                       | Stem completion                          |                                             |                             |
| Verbal fluency        | Animal naming test                       | production, semantic, executive functioning |                             |
| Memory (10 scores)    | BVMT                                     | Immediate total recall T-score              | Spatial, recall             |
|                       |                                          | Delayed recall T-score                      |                             |
|                       |                                          | Delayed recall percent retained             |                             |
|                       |                                          | Delayed recognition discrimination index    |                             |
|                       | HVLT                                     | Immediate total recall T-score              | Verbal, recall              |
|                       |                                          | Delayed recall T-score                      |                             |
|                       |                                          | Delayed recall percent retained             |                             |
|                       |                                          | Delayed recognition discrimination index    |                             |
| Spatial span          | Span forward                             | Spatial, recall, executive functioning      |                             |
|                       | Span backward                            |                                             |                             |
| Attention (10 scores) | Posner orienting task, reaction time     | Visual field effect (left-right)            | Visuospatial bias           |
|                       |                                          | Overall performance                         | Sustained attention         |
|                       |                                          | Validity effect (valid-invalid)             | Attention shifting          |
|                       |                                          | Disengagement effect [(LI-LV)-RI-RV]        | Reorienting attention       |
|                       | Posner orienting task, accuracy          | Visual field effect (left-right)            | Visuospatial bias           |
|                       |                                          | Overall performance                         | Sustained attention         |
|                       |                                          | Validity effect (valid-invalid)             | Attention shifting          |
|                       |                                          | Disengagement effect [(LI-LV)-RI-RV]        | Reorienting attention       |
|                       | BIT star cancellation                    | Center of cancellation                      | Visuomotor spatial deficits |
|                       | Mesulam unstructured symbol cancellation | Center of cancellation                      |                             |

<sup>1</sup>Collected separately for the left and right limb

**Supplementary Table 3.** Prediction of 1 year scores using demographics and the acute score.

| Prediction of 1 year    | Standardized $\beta$ |                |                |                |                |
|-------------------------|----------------------|----------------|----------------|----------------|----------------|
|                         | Language             | Verbal Mem     | Spatial Mem    | Motor          | Attention      |
| Lesion size             | -0.020               | -0.018         | 0.311*         | -0.081         | 0.005          |
| Age                     | -0.013               | -0.270*        | -0.204*        | -0.048         | -0.126         |
| Education (years)       | 0.288**              | -0.002         | 0.077          | -0.014         | 0.046          |
| Therapy (hours)         | -0.056               | -0.045         | -0.069         | -0.103         | 0.059          |
| Sub-Acute score         | 0.606**              | 0.696**        | 0.628**        | 0.735**        | 0.592**        |
| Adjusted R <sup>2</sup> | <b>0.543**</b>       | <b>0.618**</b> | <b>0.467**</b> | <b>0.661**</b> | <b>0.306**</b> |

\*P<0.05

\*\*P<0.001

**Supplementary Table 4.** Correlations between demographics and behavioral measures.

| Controls (n=31)                                             | Age      | Education (years) | Therapy (hours) | Lesion size | Lacunae (#) | WM Disease |
|-------------------------------------------------------------|----------|-------------------|-----------------|-------------|-------------|------------|
| Age                                                         |          | 0.305*            | -               | -           |             |            |
| Education (years)                                           |          |                   | -               | -           |             |            |
| <b>Stroke (n=132)</b>                                       |          |                   |                 |             |             |            |
| Age                                                         |          | -0.103            | 0.156           | 0.064       | 0.069       | 0.229**    |
| Education (years)                                           |          |                   | -0.010          | -0.152      | -0.165      | -0.006     |
| Therapy (hours)                                             |          |                   |                 | 0.476**     | 0.043       | -0.054     |
| Lesion size                                                 |          |                   |                 |             | -0.102      | -0.147     |
| Lacunae (#)                                                 |          |                   |                 |             |             | 0.362**    |
| <b>NIHSS</b>                                                |          |                   |                 |             |             |            |
| Total                                                       | 0.098    | -0.048            | 0.588**         | 0.588**     | -0.070      | -0.040     |
| <b>Acute (2 weeks) post stroke</b>                          |          |                   |                 |             |             |            |
| Language                                                    | -0.167   | 0.173             | -0.523**        | -0.447**    | -0.183*     | -0.047     |
| Verbal Memory                                               | -0.262** | 0.305**           | -0.277**        | -0.125      | -0.106      | -0.036     |
| Spatial Memory                                              | -0.298** | 0.342**           | -0.434**        | -0.426**    | 0.008       | -0.078     |
| Attention                                                   | -0.055   | 0.161             | -0.197*         | -0.343**    | 0.088       | 0.143      |
| Motor                                                       | -0.111   | 0.030             | -0.531**        | -0.419**    | 0.172       | 0.094      |
| <b>3 Months</b>                                             |          |                   |                 |             |             |            |
| Language                                                    | -0.153   | 0.329**           | -0.553**        | -0.553**    | -0.223*     | -0.051     |
| Verbal Memory                                               | -0.316** | 0.250*            | -0.295**        | -0.178      | -0.153      | -0.011     |
| Spatial Memory                                              | -0.173   | 0.331**           | -0.112          | -0.092      | -0.168      | -0.193     |
| Attention                                                   | -0.188   | 0.104             | -0.411**        | -0.418**    | -0.002      | 0.133      |
| Motor                                                       | -0.175   | -0.005            | -0.555**        | -0.286**    | 0.087       | 0.051      |
| <b>Improvement (Acute to 3 months)</b>                      |          |                   |                 |             |             |            |
| Language                                                    | 0.133    | 0.027             | 0.351**         | 0.220*      | 0.116       | 0.040      |
| Verbal Memory                                               | -0.045   | -0.031            | 0.007           | 0.059       | 0.041       | 0.078      |
| Spatial Memory                                              | 0.084    | 0.036             | 0.300**         | 0.455**     | -0.149      | -0.132     |
| Attention                                                   | -0.009   | -0.166            | 0.283*          | 0.276*      | -0.147      | -0.129     |
| Motor                                                       | 0.014    | 0.084             | 0.293**         | 0.181       | -0.055      | -0.076     |
| <b>Improvement (Acute to 3 months, acute regressed out)</b> |          |                   |                 |             |             |            |
| Language                                                    | -0.019   | 0.283**           | -0.158          | 0.283**     | -0.082      | -0.007     |
| Verbal Memory                                               | -0.216   | 0.089             | -0.142          | -0.027      | -0.009      | 0.072      |
| Spatial Memory                                              | -0.064   | 0.218             | 0.154           | 0.235*      | -0.188      | -0.211     |
| Attention                                                   | -0.208   | -0.026            | -0.119          | -0.087      | -0.088      | -0.023     |
| Motor                                                       | -0.097   | 0.079             | -0.035          | -0.031      | 0.004       | -0.030     |

\*\* Correlation is significant at the 0.01 level (2-tailed)

\* Correlation is significant at the 0.05 level (2-tailed)
